# Supplementary material for: miRNA-342 suppresses renal interstitial fibrosis in diabetic nephropathy by targeting SOX6
Source: PubMed Central journal article supplement — Int J Mol Med. 2019 Oct 31;45(1):45–52. doi: 10.3892/ijmm.2019.4388 (PMC6889927; doi:10.3892/ijmm.2019.4388), 2019-10-31
Supplement: Supplementary_Data.pdf [file Supplementary_Data.pdf]

Figure S1. Schematic diagram showing the signaling pathway identified in this study to play a role in diabetic nephropathy.

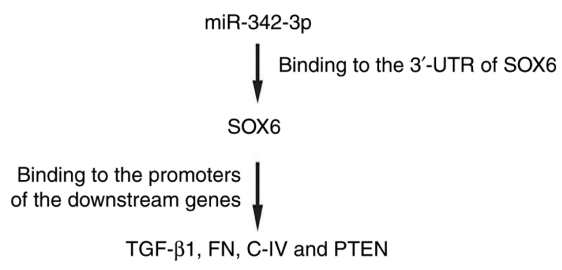

Table SI. Primer sequences of genes examined by RT-qPCR.

| Gene                | Primer sequences                                                                 |
|---------------------|----------------------------------------------------------------------------------|
| pGL3-SOX6-3'-UTR-WT | Forward: 5'-TAATTGTTTCGTAAAGTGTGAGA-3'<br>Reverse: 5'-AAGACCTTCTTAGTTATACACGA-3' |
| pGL3-SOX6-3'UTR-MUT | Forward: 5'-TAATTGTTTCGTAAAGCTGACTA-3'<br>Reverse: 5'-AAGACCTTCTTAGTTATACACGA-3' |
| TGF- $\beta$ 1      | Forward: 5'-TGACCTGGGCACCATCCATGA-3'<br>Reverse: 5'-CACCTTGGGCTTGCGACCCAC-3'     |
| FN                  | Forward: 5'-TGGAGGAAGCCGAGGTTT-3'<br>Reverse: 5'-CAGCGGTTTGCGATGGTA-3'           |
| C-IV                | Forward: 5'-GGCCCCTGCTGAAGCGTT-3'<br>Reverse: 5'-GATTCCACGAGCCCCTTG-3'           |
| PTEN                | Forward: 5'-AGAACTTATCAAACCCT-3'<br>Reverse: 5'-GTCCTTACTTCCCCAT-3'              |
| SOX6                | Forward: 5'-CGACCACACCAUCACCUCA-3'<br>Reverse: 5'-UGAGGUGAUGGUGUGGUCG-3'         |
| GAPDH               | Forward: 5'-ACTCTTCCAGCCTTCCTTCC-3'<br>Reverse: 5'-GAGGAGCAATGATCTTGATCTTC-3'    |

WT, wild-type; SOX6, SRY-box 6; MCs, mesangial cells; TGF- $\beta$ 1, transforming growth factor  $\beta$ 1; FN, fibronectin; C-IV, collagen IV.
